# Supplementary material for: Anti-C5 antibody treatment for delayed hemolytic transfusion reactions in sickle cell disease
Source: PubMed Central journal article supplement — Haematologica. 2020 Jul 2;105(11):2694–7. doi: 10.3324/haematol.2020.253856 (PMC7604638; doi:10.3324/haematol.2020.253856), 2020-07-02
Supplement: 2020_253856-Disclosures_Contributions.pdf [file 2020_253856-Disclosures_Contributions.pdf]

Haematologica  
HAEMATOL/2020/253856  
Version 3

Anti-C5 antibody treatment for delayed hemolytic transfusion reactions  
in sickle cell disease

Aline Floch, Alexandre Morel, Fabian Zanchetta-Balint, Catherine Cordonnier-Jourdin, Slimane Allali, Maximilien Grall, Ghislaine Ithier, Benjamin Carpentier, Sadaf Pakdaman, Jean-Claude Merle, Radjiv Goulabchand, Tackwa Khalifeh, Ana Berceanu, Cécile Helmer, Christelle Chantalat-Auger, Véronique Frémeaux-Bacchi, Marc Michel, Mariane de Montalembert, Armand Mekontso-Dessap, France Pirenne, Anoosha Habibi, and Pablo Bartolucci

Disclosures: none

Contributions: P.B. and A.H. designed the research; A.F., A.M., F.Z.-B., S.P C.C.-J., S.A., M.G., G.I., B.C., J-C.M., R.G., C.H., T.K., A.B., C.C-A., V.F-B., M.M., A.M-D., M. d M. and F.P. collected the data; A.F. performed the statistical analysis; A.F., A.H. and P.B. analyzed and interpreted the data; A.F. and P.B. wrote the paper, which was critically reviewed by all authors.
